# Supplementary material for: App-Based Interventions for Moderate to Severe Depression: A Systematic Review and Meta-Analysis
Source: PubMed Central journal article supplement (PMC10660171; doi:10.1001/jamanetworkopen.2023.44120), 2023-11-20
Supplement: jamanetwopen-e2344120-s002.pdf [file jamanetwopen-e2344120-s002.pdf]

## Data Sharing Statement

Bae. App-Based Interventions for Moderate to Severe Depression. *JAMA Netw Open*.  
Published November 20, 2023. doi:10.1001/jamanetworkopen.2023.44120

### Data

**Data available:** No

### Additional Information

**Explanation for why data not available:** This manuscript does not include original data. Data are extracted from literature and are publicly available.
